# Supplementary material
Source: ML conference proceedings conference paper supplement (https://proceedings.neurips.cc/paper_files/paper/2015/hash/0aa1883c6411f7873cb83dacb17b0afc-Abstract.html)
Supplement: Supplementary file [file 0aa1883c6411f7873cb83dacb17b0afc-Supplemental.zip]

---

# Supplements to “Optimal Ridge Detection using Coverage Risk”

---

**Yen-Chi Chen**  
 Department of Statistics  
 Carnegie Mellon University  
 yenchic@andrew.cmu.edu

**Christopher R. Genovese**  
 Department of Statistics  
 Carnegie Mellon University  
 genovese@stat.cmu.edu

**Shirley Ho**  
 Department of Physics  
 Carnegie Mellon University  
 shirleyh@andrew.cmu.edu

**Larry Wasserman**  
 Department of Statistics  
 Carnegie Mellon University  
 larry@stat.cmu.edu

## 1 Proofs

Before we prove Theorem 2, we need the following lemma for comparing two curves.

**Lemma 4** *Let  $S_1, S_2$  be two bounded smooth curves in  $\mathbb{R}^d$ . Let  $\pi_{12} : S_1 \mapsto S_2$  and  $\pi_{21} : S_2 \mapsto S_1$  be the projections between them. For  $a \in S_1$  and  $b \in S_2$ , define  $g_1(a)$  and  $g_2(b)$  as the unit tangent vectors for  $S_1$  and  $S_2$  at  $a$  and  $b$  respectively. Assume  $S_1$  and  $S_2$  are similar in the following sense:*

(S1)  $\pi_{12}$  and  $\pi_{21}$  are one-one and onto,

(S2) the projections are similar:

$$\max \left\{ \sup_{x \in S_1} \|\pi_{12}(x) - \pi_{21}^{-1}(x)\|, \sup_{x \in S_2} \|\pi_{21}(x) - \pi_{12}^{-1}(x)\| \right\} = O(\epsilon_1),$$

(S3) the tangent vectors are similar:

$$\max \left\{ \sup_{x \in S_1} |g_1(x)^T g_2(\pi_{12}(x))|, \sup_{x \in S_2} |g_2(x)^T g_1(\pi_{21}(x))| \right\} = 1 + O(\epsilon_2),$$

(S4) the length are similar:

$$\text{length}(S_1) - \text{length}(S_2) = O(\epsilon_3)$$

with  $\epsilon_1, \epsilon_2, \epsilon_3$  being very small. Let  $\mathcal{I}_1 = \int_{S_1} \|x - \pi_{12}(x)\|^2 dx$  and  $\mathcal{I}_2 = \int_{S_2} \|y - \pi_{21}(y)\|^2 dy$ . Then we have

$$|\mathcal{I}_1 - \mathcal{I}_2| = \sqrt{\mathcal{I}_2} O(\epsilon_1) + \mathcal{I}_2 O(\epsilon_2 + \epsilon_3).$$

Moreover, if we further assume

(S5) the Hausdorff distance  $\text{Haus}(S_1, S_2) = O(\epsilon_4)$  is small,

then for any function  $\xi : \mathbb{R}^d \mapsto \mathbb{R}$  that has bounded continuous derivative, we have

$$\int_0^1 \xi(\gamma_1(t)) dt = \int_0^1 \xi(\gamma_2(t)) dt (1 + O(\epsilon_2 + \epsilon_3 + \epsilon_4)).$$

PROOF. Since  $S_1$  and  $S_2$  are two bounded, smooth curves. We may parametrized them by  $\gamma_1 : [0, 1] \mapsto S_1$  and  $\gamma_2 : [0, 1] \mapsto S_2$  with

$$\begin{aligned}\gamma_1'(t) &= \tilde{g}_1(\gamma_1(t)), \gamma_1(0) = s_1, \\ \gamma_2'(t) &= \tilde{g}_2(\gamma_2(t)), \gamma_2(0) = s_2 = \pi_{12}(\gamma_1(0)),\end{aligned}\tag{1}$$

where  $\tilde{g}_1 = \ell_1 g_1$  and  $\tilde{g}_2 = \ell_2 g_2$  for  $\ell_1, \ell_2$  being the length of  $S_1$  and  $S_2$  and  $s_1$  one of the end point of  $S_1$ . The constant  $\ell_j$  works as a normalization constant since  $g_j$  is an unit vector; it is easy to verify that

$$\text{length}(S_j) = \int_0^1 \|\tilde{g}_j(t)\| dt = \int_0^1 \ell_j \|g_j(t)\| dt = \ell_j.$$

The starting point  $s_2 \in S_2$  must be the projection  $\pi_{12}(s_1)$  otherwise the condition (S1) will not hold.

Let

$$\mathcal{I}_1 = \int_0^1 \|\gamma_1(t) - \pi_{12}(\gamma_1(t))\|^2 dt, \quad \mathcal{I}_2 = \int_0^1 \|\gamma_2(t) - \pi_{21}(\gamma_2(t))\|^2 dt.\tag{2}$$

Then the goal is to prove  $\mathcal{I}_1 - \mathcal{I}_2 = O(\epsilon_1^2) + O(\epsilon_2^2)$ .

Now we consider another parametrization for  $S_2$ . Let  $\eta_2 : [0, 1] \mapsto S_2$  such that  $\eta_2(t) = \pi_{12}(\gamma_1(t))$ . By (S1),  $\eta_2$  is a parametrization for  $S_2$ . The parametrization  $\eta_2(t)$  has the following useful properties:

$$\begin{aligned}\eta_2(0) &= \pi_{12}(\gamma_1(0)) = s_2, \\ \eta_2'(t) &= g_2(\eta_2(t)) g_2(\eta_2(t))^T \gamma_1'(t) = g_2(\eta_2(t)) g_2(\pi_{12}(\gamma_1(t)))^T \tilde{g}_1(\gamma_1(t)).\end{aligned}\tag{3}$$

By condition (S3) and (S4), we have

$$\begin{aligned}g_2(\pi_{12}(\gamma_1(t)))^T \tilde{g}_1(\gamma_1(t)) &= \ell_1 g_2(\pi_{12}(\gamma_1(t)))^T g_1(\gamma_1(t)) \\ &= \ell_1 (1 + O(\epsilon_2)) \\ &= \ell_2 (1 + O(\epsilon_2) + O(\epsilon_3))\end{aligned}\tag{4}$$

uniformly for all  $t \in [0, 1]$ . Now apply this result to  $\eta_2'(t)$ , we obtain that

$$\eta_2'(t) = g_2(\eta_2(t)) (1 + O(\epsilon_2) + O(\epsilon_3)).\tag{5}$$

Together with  $\eta_2(0) = \gamma_2(0)$ , we have

$$\sup_{t \in [0, 1]} \|\eta_2(t) - \gamma_2(t)\| = O(\epsilon_2) + O(\epsilon_3).\tag{6}$$

Now by definition of  $\mathcal{I}_1$  and the fact that  $\pi_{12}^{-1}(\eta_2(t)) = \gamma_1(t)$ , we have

$$\begin{aligned}\mathcal{I}_1 &= \int_0^1 \|\gamma_1(t) - \pi_{12}(\gamma_1(t))\|^2 dt \\ &= \int_0^1 \|\pi_{12}^{-1}(\eta_2(t)) - \eta_2(t)\|^2 dt \\ &= \int_0^1 \|\pi_{21}(\eta_2(t)) + O(\epsilon_1) - \eta_2(t)\|^2 dt \quad \text{by (S2)} \\ &= \mathcal{I}_2' + \sqrt{\mathcal{I}_2'} O(\epsilon_1),\end{aligned}\tag{7}$$

where  $\mathcal{I}_2' = \int_0^1 \|\pi_{21}(\eta_2(t)) - \eta_2(t)\|^2 dt$ .

Now we bound the difference between  $\mathcal{I}_2'$  and  $\mathcal{I}_2$ . Let  $U$  be an uniform distribution over  $[0, 1]$  and define  $h(x) : [0, 1] \mapsto \mathbb{R}$  as  $h(x) = \|\pi_{21}(\gamma_2(x)) - \gamma_2(x)\|$ . Note that it is easy to see that  $h(x)$  has bounded derivative. Then,

$$\mathcal{I}_2 = \mathbb{E} \|\pi_{21}(\gamma_2(U)) - \gamma_2(U)\|^2 = \mathbb{E} h(U).\tag{8}$$

Since both  $\gamma_2$  and  $\eta_2$  are parametrization for the curve  $S_2$ ,  $\gamma_2^{-1}$  is well defined for all image of  $\eta_2$ . We define the random variable  $W = \gamma_2^{-1}(\eta_2(U))$ . Then by definition of  $\mathcal{I}'_2$ ,

$$\mathcal{I}'_2 = \mathbb{E}\|\pi_{21}(\eta_2(U)) - \eta_2(U)\|^2 = \mathbb{E}h(W). \quad (9)$$

Since  $\sup_{t \in [0,1]} \|\gamma'_2(t) - \eta'_2(t)\| = O(\epsilon_2) + O(\epsilon_3)$ , we have  $\gamma_2^{-1}(\eta_2(x)) = x + O(\epsilon_2) + O(\epsilon_3)$ . Thus, the  $p_W(t) - p_U(t) = O(\epsilon_2) + O(\epsilon_3)$ , where  $p_W$  and  $p_U$  are the probability density for random variable  $W$  and  $U$ . Since  $U$  is uniform distribution,  $p_U = 1$  so that

$$\begin{aligned} \mathbb{E}h(W) &= \int_0^1 h(t)p_W(t)dt \\ &= \int_0^1 h(t)(p_U(t) + O(\epsilon_2) + O(\epsilon_3))dt \\ &= \int_0^1 h(t)(1 + O(\epsilon_2) + O(\epsilon_3))dt \\ &= \mathbb{E}h(U)(1 + O(\epsilon_2) + O(\epsilon_3)). \end{aligned} \quad (10)$$

This implies  $\mathcal{I}'_2 = \mathcal{I}_2(1 + O(\epsilon_2) + O(\epsilon_3))$ . Therefore, by (7) we conclude

$$\begin{aligned} \mathcal{I}_1 &= \mathcal{I}'_2 + \sqrt{\mathcal{I}'_2}O(\epsilon_1) \\ &= \mathcal{I}_2 + \sqrt{\mathcal{I}_2}O(\epsilon_1) + \mathcal{I}_2(O(\epsilon_2) + O(\epsilon_3)), \end{aligned} \quad (11)$$

which completes the proof for the first assertion.

Now we prove the second assertion, here we will assume (S5). Since  $\xi$  has bounded first derivative,

$$\begin{aligned} \int_0^1 \xi(\gamma_1(t))dt &= \int_0^1 \xi(\pi_{12}(\gamma_1(t)))dt(1 + O(\text{Haus}(S_1, S_2))) \\ &= \int_0^1 \xi(\eta_2(t))dt(1 + O(\epsilon_4)). \end{aligned} \quad (12)$$

Again, let  $U$  be the uniform distribution and  $W = \gamma_2^{-1}(\eta_2(U))$ . We now define the function  $\tilde{h}(t) = \xi(\gamma_2(t))$  for  $t \in [0, 1]$ . Since both  $\xi$  and  $\gamma_2$  are bounded differentiable,  $\tilde{h}$  is also bounded differentiable. Then it is easy to see that

$$\begin{aligned} \int_0^1 \xi(\eta_2(t))dt &= \xi(\gamma_2(t)\gamma_2^{-1}(\eta_2(t)))dt = \mathbb{E}\tilde{h}(W) \\ \int_0^1 \xi(\gamma_2(t))dt &= \mathbb{E}\tilde{h}(U). \end{aligned} \quad (13)$$

Now by the same derivation of (10), we conclude

$$\int_0^1 \xi(\eta_2(t))dt = \mathbb{E}\tilde{h}(W) = \mathbb{E}\tilde{h}(U)(1 + O(\epsilon_2) + O(\epsilon_3)). \quad (14)$$

Thus, by (12) and (14), we conclude

$$\int_0^1 \xi(\gamma_1(t))dt = \int_0^1 \xi(\gamma_2(t))dt(1 + O(\epsilon_2) + O(\epsilon_3) + O(\epsilon_4)), \quad (15)$$

which completes the proof.

□

The following Lemma bounds the rate of convergence for the kernel density estimator and will be used frequently in the following derivation.

**Lemma 5 (Lemma 10 of [1]; see also [3])** Assume (K1–K2) and that  $\log n/n \leq h^d \leq b$  for some  $0 < b < 1$ . Then we have

$$\|\hat{p}_n - p\|_{k,\max} = O(h^2) + O_P\left(\sqrt{\frac{\log n}{nh^{d+2k}}}\right) \quad (16)$$

for  $k = 0, \dots, 3$ . Moreover,

$$\mathbb{E}\|\hat{p}_n - p\|_{k,\max} = O(h^2) + O\left(\sqrt{\frac{\log n}{nh^{d+2k}}}\right). \quad (17)$$

**PROOF FOR THEOREM 2.** Here we prove the case for density ridges. The case for density level set can be proved by the similar method. We will use Lemma 4 to obtain the rate. Our strategy is that first we derive  $\mathbb{E}(d(U_R, \hat{R}_n)^2)$  and then show that the other part  $\mathbb{E}(d(U_{\hat{R}_n}, R)^2)$  is similar to the first part.

**Part 1.** We first introduce the concept of reach [2]. For a smooth set  $A$ , the reach is defined as

$$\text{reach}(A) = \inf\{r : \text{every point in } A \oplus r \text{ has an unique projection onto } A.\}. \quad (18)$$

The reach condition is essential to establish a one-one projection between two smooth sets.

By Lemma 2, property 7 of [1],

$$\text{reach}(R) \geq \min\left\{\frac{\delta_R}{2}, \frac{\beta_2^2}{A_2(\|p^{(3)}\|_{\max} + \|p^{(4)}\|_{\max})}\right\} \quad (19)$$

for some constant  $A_2$ . Note that  $\delta_R$  and  $\beta_2$  are the constants in condition (R).

Thus, as long as  $\hat{R}_n$  is close to  $R$ , every point on  $\hat{R}_n$  has an unique projection onto  $R$ . Similarly,  $\text{reach}(\hat{R}_n)$  will have a similar bound to  $\text{reach}(R)$  whenever  $\|\hat{p}_n - p\|_{4,\max}^*$  is small (reach only depends on fourth derivatives). Hence, every point on  $R$  will have an unique projection onto  $\hat{R}_n$ . The projections between  $R$  and  $\hat{R}_n$  will be one-one and onto except for points near the end points for  $R$  and  $\hat{R}_n$ . That is, when  $\|\hat{p}_n - p\|_{4,\max}^*$  is sufficiently small, there exists  $R^\dagger \subset R$  and  $\hat{R}_n^\dagger \subset \hat{R}_n$  such that the projection between  $R^\dagger$  and  $\hat{R}_n^\dagger$  are one-one and onto. Moreover, the length difference

$$\begin{aligned} \text{length}(R) - \text{length}(R^\dagger) &= O(\text{Haus}(\hat{R}_n, R)), \\ \text{length}(\hat{R}_n) - \text{length}(\hat{R}_n^\dagger) &= O(\text{Haus}(\hat{R}_n, R)). \end{aligned} \quad (20)$$

Note that by Theorem 6 in [3],

$$\text{Haus}(\hat{R}_n, R) = O(\|\hat{p}_n - p\|_{2,\max}^*). \quad (21)$$

Let  $x \in R^\dagger$ , and let  $x' = \pi_{\hat{R}_n^\dagger}(x) \in \hat{R}_n^\dagger$  be its projection onto  $\hat{R}_n^\dagger$ . Then by Theorem 3 in [1] (see their derivation in the proof, the empirical approximation, page 30-32 and equation (79)), we have

$$x' - x = W_2(x)(\hat{g}_n(x) - g(x))(1 + O(\|\hat{p}_n - p\|_{3,\max}^*)), \quad (22)$$

where

$$\begin{aligned} W_2(x) &= N(x)H_N^{-1}(x)N(x) \\ H_N(x) &= N(x)^T H(x)N(x) \end{aligned} \quad (23)$$

and  $N(x)$  is a  $d \times (d-1)$  matrix called the *normal matrix* for  $R$  at  $x$  whose columns space spanned the normal space for  $R$  at  $x$ . The existence for  $N(x)$  is given in Section 3.2 and Lemma 2 in [1]. Thus, we have

$$\mathbb{E}\left(d(x, \hat{R}_n)^2\right) = \mathbb{E}\left(\|x - x'\|^2\right) = \mathbb{E}\|W_2(x)(\hat{g}_n(x) - g(x))\|^2 + \Delta_n, \quad (24)$$

where  $\Delta_n$  is the remaining term and by Cauchy-Schwartz inequality,

$$\Delta_n \leq \mathbb{E} \|W_2(x)(\hat{g}_n(x) - g(x))\|^2 O(\mathbb{E} \|\hat{p}_n - p\|_{3,\max}^*).$$

Thus,

$$\begin{aligned} \mathbb{E} (d(x, \hat{R}_n)^2) &= \mathbb{E} \|W_2(x)(\hat{g}_n(x) - g(x))\|^2 + \Delta_n \\ &= \mathbb{E} \|W_2(x)(\hat{g}_n(x) - \mathbb{E}(\hat{g}_n(x)) + \mathbb{E}(\hat{g}_n(x)) - g(x))\|^2 + \Delta_n \\ &= \text{Tr}(\text{Cov}(W_2(x)\hat{g}_n(x))) + \|W_2(x)(\mathbb{E}(\hat{g}_n(x)) - g(x))\|^2 + \Delta_n \\ &= \frac{1}{nh^{d+2}} \text{Tr}(\Sigma(x)) + h^4 b(x)^T b(x) + o\left(\frac{1}{nh^{d+2}}\right) + o(h^4), \end{aligned} \quad (25)$$

where

$$\begin{aligned} \Sigma(x) &= W_2(x)\Sigma(K)W_2(x)p(x), \\ b(x) &= c(K)W_2(x)\nabla(\nabla^2 p(x)) \end{aligned} \quad (26)$$

are related to the variance and bias for nonparametric gradient estimation ( $\Sigma(K)p(x)$  is the asymptotic covariance matrix for  $\hat{p}_n$  and  $c(K)\nabla(\nabla^2 p(x))$  is the asymptotic bias for  $\hat{p}_n$ ).  $\Sigma(K)$  is a matrix and  $c(K)$  is a scalar; they both depends only on the kernel function  $K$ .  $\nabla^2 = \frac{\partial^2}{\partial x_1^2} + \dots + \frac{\partial^2}{\partial x_d^2}$  is the Laplacian operator.

Now we compute  $\mathbb{E}(d(U_R, \hat{R}_n)^2)$ . Note that since the length difference between  $R$  and  $R^\dagger$  is bounded by (20) and (21):

$$\begin{aligned} \mathbb{P}(U_R \in R^\dagger) &= 1 - O(\mathbb{E}(\|\hat{p}_n - p\|_{2,\max}^*)) \\ &= 1 - O(h^2) - O\left(\sqrt{\frac{\log n}{nh^{d+4}}}\right). \end{aligned} \quad (27)$$

Note that we use Lemma 5 to convert the norm into probability bound. By tower property (law of total expectation),

$$\begin{aligned} \mathbb{E}(d(U_R, \hat{R}_n)^2) &= \mathbb{E}(\mathbb{E}(d(U_R, \hat{R}_n)^2 | U_R)) \\ &= \mathbb{E}(\mathbb{E}(d(U_R, \hat{R}_n)^2 | U_R, U_R \in R^\dagger))\mathbb{P}(U_R \in R^\dagger) \\ &\quad + \mathbb{E}(\mathbb{E}(d(U_R, \hat{R}_n)^2 | U_R, U_R \notin R^\dagger))\mathbb{P}(U_R \notin R^\dagger) \\ &= \mathbb{E}\left(\frac{1}{nh^{d+2}} \text{Tr}(\Sigma(U_R)) + h^4 b(U_R)^T b(U_R)\right) + o\left(\frac{1}{nh^{d+2}}\right) + o(h^4). \end{aligned} \quad (28)$$

Note that by (27), the contribution from  $\mathbb{P}(U_R \notin R^\dagger)$  is smaller than the main effect in (25) so we absorb it into the small  $o$  terms. Defining  $B_R^2 = \mathbb{E}(b(U_R)^T b(U_R))$  and  $\sigma_R^2 = \mathbb{E}(\text{Tr}(\Sigma(U_R)))$ , we obtain

$$\mathbb{E}(d(U_R, \hat{R}_n)^2) = B_R^2 h^4 + \frac{\sigma_R^2}{nh^{d+2}} + o\left(\frac{1}{nh^{d+2}}\right) + o(h^4). \quad (29)$$

**Part 2.** We have proved the first part for the  $\mathcal{L}_2$  coverage risk. Now we prove the result for  $\mathbb{E}(d(U_{\hat{R}_n}, R)^2)$ ; this will apply Lemma 4. If we think of  $R^\dagger$  as  $S_1$  and  $\hat{R}_n^\dagger$  as  $S_2$  in Lemma 4, then

$$\begin{aligned} \mathbb{E}(d(U_{R^\dagger}, \hat{R}_n^\dagger)^2 | X_1, \dots, X_n) &= \int_0^1 \|\gamma_1(t) - \pi_{12}(\gamma_1(t))\|^2 dt = \mathcal{I}_1 \\ \mathbb{E}(d(U_{\hat{R}_n^\dagger}, R^\dagger)^2 | X_1, \dots, X_n) &= \int_0^1 \|\gamma_2(t) - \pi_{21}(\gamma_2(t))\|^2 dt = \mathcal{I}_2. \end{aligned} \quad (30)$$

Thus,  $\mathbb{E}(d(U_{\hat{R}_n^\dagger}, R^\dagger)^2)$  is approximated by  $\mathbb{E}(d(U_{R^\dagger}, \hat{R}_n^\dagger)^2)$  if the  $\epsilon_1, \epsilon_2, \epsilon_3$  in Lemma 4 is small. Here we bound  $\epsilon_j$ .

The bound for  $\epsilon_1$  is simple. For all  $x \in S_1$ , let  $\theta$  be the angle between the two vectors  $v_1 = \pi_{12}(x) - x$  and  $v_2 = \pi_{21}^{-1}(x) - x$ . By the property of projection,  $v_1$  is normal to  $\hat{R}_n$  at  $\pi_{12}(x)$

and  $v_2$  is normal to  $R$  at  $x$ . Thus, by Lemma 2 properties 5 and 6 of [1], the angle  $\theta$  is bounded by  $O(\|\hat{p}_n - p\|_{3,\max}^*)$ . Note that their Lemma proves the normal matrices  $N(x)$  and  $\hat{N}_n(\pi_{12}(x))$  are close which implies the canonical angle between two subspace are close so that  $\theta$  is bounded. Now by the fact that both  $\|\pi_{12}(x) - x\|$  and  $\|\pi_{21}^{-1}(x) - x\|$  are bounded by  $\text{Haus}(\hat{R}_n, R)$ , we conclude  $\epsilon_1 \leq \text{Haus}(\hat{R}_n, R) \times \theta = O(\|\hat{p}_n - p\|_{3,\max}^{*2})$ .

For  $\epsilon_2$ , we will use the property of normal matrix  $N(x)$ . Let  $\hat{N}_n(x)$  be the normal matrix for  $\hat{R}_n$  at  $x$ . By Lemma 2, properties 5 and 6 of [1],

$$\begin{aligned} \|N(x)N(x)^T - \hat{N}_n(\pi_{\hat{R}_n}(x))\hat{N}_n(\pi_{\hat{R}_n}(x))^T\|_{\max} &= O(\text{Haus}(\hat{R}_n, R)) + O(\|\hat{p}_n - p\|_{3,\max}^*) \\ &= O(\|\hat{p}_n - p\|_{3,\max}^*). \end{aligned}$$

$N(x)N(x)^T$  is the projection matrix onto normal space; so the tangent vector is perpendicular to that projection. The bounds for the two projection matrix implies the bound to the two tangent vectors. Thus,  $\epsilon_2 = O(\|\hat{p}_n - p\|_{3,\max}^*)$ .

For  $\epsilon_3$ , since the smoothness for  $\hat{R}_n$  is similar to  $R$  (the normal direction is similar by  $\epsilon_2$ ) and their Hausdorff distance is bounded by  $O(\|\hat{p}_n - p\|_{2,\max}^*)$ . The length difference is at the same rate of Hausdorff distance. Thus, we may pick  $\epsilon_3 = O(\|\hat{p}_n - p\|_{2,\max}^*)$ .

Let  $\mathcal{I}_1 = \mathbb{E}(d(U_{R^\dagger}, \hat{R}_n^\dagger)^2 | X_1, \dots, X_n)$  and  $\mathcal{I}_2 = \mathbb{E}(d(U_{\hat{R}_n^\dagger}, R^\dagger)^2 | X_1, \dots, X_n)$ . By Lemma 4 and the above choice for  $\epsilon_j$ , we conclude

$$\mathcal{I}_1 = \mathcal{I}_2(1 + O(\|\hat{p}_n - p\|_{3,\max}^*)) + \sqrt{\mathcal{I}_2}O(\|\hat{p}_n - p\|_{3,\max}^{*2}). \quad (31)$$

Thus, by tower property again (taking expectation over both side) and Lemma 5  $\mathbb{E}\|\hat{p}_n - p\|_{3,\max}^* = O(h^2) + O\left(\sqrt{\frac{\log n}{nh^{d+6}}}\right) = o(1)$ ,

$$\mathbb{E}(d(U_{R^\dagger}, \hat{R}_n^\dagger)^2) = \mathbb{E}(\mathcal{I}_1) = \mathbb{E}(\mathcal{I}_2) + o(1) = \mathbb{E}(d(U_{\hat{R}_n^\dagger}, R^\dagger)^2) + o(1). \quad (32)$$

Now since by (20) and the fact that  $\mathbb{E}\text{Haus}(\hat{R}_n, R) = o(1)$ , we have

$$\begin{aligned} \mathbb{E}(d(U_{R^\dagger}, \hat{R}_n^\dagger)^2) &= \mathbb{E}(d(U_R, \hat{R}_n)^2)(1 + o(1)) \\ \mathbb{E}(d(U_{\hat{R}_n^\dagger}, R^\dagger)^2) &= \mathbb{E}(d(U_{\hat{R}_n}, R)^2)(1 + o(1)). \end{aligned} \quad (33)$$

Combining by (29), (32) and (33), we conclude

$$\begin{aligned} \text{Risk}_{2,n} &= \frac{\mathbb{E}(d(U_R, \hat{R}_n)^2) + \mathbb{E}(d(U_{\hat{R}_n}, R)^2)}{2} \\ &= \mathbb{E}(d(U_R, \hat{R}_n)^2) + o(1) \\ &= B_R^2 h^4 + \frac{\sigma_R^2}{nh^{d+2}} + o\left(\frac{1}{nh^{d+2}}\right) + o(h^4), \end{aligned} \quad (34)$$

where  $B_R^2 = \mathbb{E}(b(U_R)^T b(U_R))$  and  $\sigma_R^2 = \mathbb{E}(\text{Tr}(\Sigma(U_R)))$ . Note that all the above derivation works only when

$$\mathbb{E}\|\hat{p}_n - p\|_{3,\max}^* = O(h^2) + O\left(\sqrt{\frac{\log n}{nh^{d+6}}}\right) = o(1). \quad (35)$$

This requires  $h \rightarrow 0$  and  $\frac{\log n}{nh^{d+6}} \rightarrow 0$ , which constitutes the conditions on  $h$  we need.

□

**PROOF FOR THEOREM 3.** Since we are proving the bootstrap consistency, we assume  $X_1, \dots, X_n$  are given.

By Theorem 2, the estimated risk  $\widehat{\text{Risk}}_{n,2}$  has the following asymptotic behavior

$$\widehat{\text{Risk}}_{n,2} = \widehat{B}_R^2 h^4 + \frac{\widehat{\sigma}_R^2}{nh^{d+2}} + o\left(\frac{1}{nh^{d+2}}\right) + o(h^4), \quad (36)$$

where

$$\begin{aligned} \widehat{B}_R^2 &= \mathbb{E} \left( \widehat{b}_n(U_{\widehat{R}_n})^T \widehat{b}_n(U_{\widehat{R}_n}) | X_1, \dots, X_n \right), \\ \widehat{\sigma}_R^2 &= \mathbb{E} \left( \text{Tr}(\widehat{\Sigma}_n(U_{\widehat{R}_n})) | X_1, \dots, X_n \right) \end{aligned} \quad (37)$$

with  $\widehat{b}_n(x) = c(K)W_2(x)\nabla(\nabla^2\widehat{p}_n(x))$  and  $\widehat{\Sigma}_n(x) = W_2(x)\Sigma(K)W_2(x)\widehat{p}_n(x)$  from (26). To prove the bootstrap consistency, it is equivalent to prove that  $\widehat{B}_R^2$  and  $\widehat{\sigma}_R^2$  converges to  $B_R$  and  $\sigma_R^2$ .

Here we prove the consistency for  $\widehat{B}_R$ . The consistency for  $\widehat{\sigma}_R$  can be proved in the similar way. We define the following two functions

$$\begin{aligned} \widehat{\Omega}_n(x) &= \|c(K)W_2(x)\nabla(\nabla^2\widehat{p}_n(x))\|^2, \\ \Omega(x) &= \|c(K)W_2(x)\nabla(\nabla^2p(x))\|^2. \end{aligned} \quad (38)$$

It is easy to see that  $\widehat{B}_R^2 = \mathbb{E} \left( \widehat{\Omega}_n(U_{\widehat{R}_n}) | X_1, \dots, X_n \right)$  and  $B_R^2 = \mathbb{E}(\Omega(U_R))$ .

Similarly as in the proof for Theorem 2, we define  $\widehat{R}_n^\dagger \subset \widehat{R}_n$  that has one-one and onto projection to  $R^\dagger$ . By (27), we can replace  $U_{\widehat{R}_n}$  by  $U_{\widehat{R}_n^\dagger}$  and  $U_R$  by  $U_{R^\dagger}$  at the cost of probability  $O(h^2) + O\left(\sqrt{\frac{\log n}{nh^{d+4}}}\right)$ .

Now we will apply Lemma 4 again to prove the result. Again, we think of  $R^\dagger$  as  $S_1$  and  $\widehat{R}_n^\dagger$  as  $S_2$ . Let  $U$  be an uniform distribution over  $[0, 1]$ . Then the random variable  $U_{R^\dagger} = \gamma_1(U)$  and  $U_{\widehat{R}_n^\dagger} = \gamma_2(U)$ . Thus,

$$\mathbb{E}(\Omega(U_{R^\dagger})) = \int_0^1 \Omega(\gamma_1(t))dt, \quad \mathbb{E} \left( \widehat{\Omega}_n(U_{\widehat{R}_n^\dagger}) | X_1, \dots, X_n \right) = \int_0^1 \widehat{\Omega}_n(\gamma_2(t))dt. \quad (39)$$

By the second assertion in Lemma 4,

$$\begin{aligned} \mathbb{E}(\Omega(U_{R^\dagger})) &= \int_0^1 \Omega(\gamma_1(t))dt \\ &= \int_0^1 \Omega(\gamma_2(t))dt(1 + O(\epsilon_2) + O(\epsilon_3) + O(\epsilon_4)) \\ &= \int_0^1 \Omega(\gamma_2(t))dt(1 + O(\|\widehat{p}_n - p\|_{3,\max}^*)). \end{aligned} \quad (40)$$

Note that we use the fact that  $\text{Haus}(\widehat{R}_n, R) = O(\|\widehat{p}_n - p\|_{2,\max}^*)$ . Since  $\Omega$  only involves third derivative for the density  $p$ , we have  $\sup_{x \in \mathbb{R}^d} \|\Omega(x) - \widehat{\Omega}_n(x)\| = O(\|\widehat{p}_n - p\|_{3,\max})$ . This implies

$$\int_0^1 \Omega(\gamma_2(t))dt = \int_0^1 \widehat{\Omega}_n(\gamma_2(t))dt + O(\|\widehat{p}_n - p\|_{3,\max}). \quad (41)$$

Now combining all the above and the definition for  $\widehat{B}_R$ , we conclude

$$\begin{aligned}
\widehat{B}_R^2 &= \mathbb{E} \left( \widehat{\Omega}_n(U_{\widehat{R}_n}) | X_1, \dots, X_n \right) \\
&= \mathbb{E} \left( \widehat{\Omega}_n(U_{\widehat{R}_n^\dagger}) | X_1, \dots, X_n \right) + O(\text{Haus}(\widehat{R}_n, R)) \\
&= \int_0^1 \widehat{\Omega}_n(\gamma_2(t)) dt + O(\text{Haus}(\widehat{R}_n, R)) \quad (\text{by (39)}) \\
&= \int_0^1 \Omega(\gamma_2(t)) dt + O(\|\widehat{p}_n - p\|_{3, \max}) \quad (\text{by (41)}) \\
&= \mathbb{E}(\Omega(U_{R^\dagger})) + O(\|\widehat{p}_n - p\|_{3, \max}) \quad (\text{by (40)}) \\
&= \mathbb{E}(\Omega(U_R)) + O(\|\widehat{p}_n - p\|_{3, \max}) \\
&= B_R^2 + O(\|\widehat{p}_n - p\|_{3, \max}).
\end{aligned} \tag{42}$$

Therefore, as long as we have  $\|\widehat{p}_n - p\|_{3, \max} = o_P(1)$ , we have

$$\widehat{B}_R^2 - B_R^2 = o_P(1). \tag{43}$$

Similarly, we the same condition implies

$$\widehat{\sigma}_R^2 - \sigma_R^2 = o_P(1). \tag{44}$$

Now recall from (36) and Theorem 2, the risk difference is

$$\begin{aligned}
\widehat{\text{Risk}}_{n,2} - \text{Risk}_{n,2} &= (\widehat{B}_R^2 - B_R^2)h^4 + \frac{\widehat{\sigma}_R^2 - \sigma_R^2}{nh^{d+2}} + o(h^4) + o\left(\frac{1}{nh^{d+2}}\right) \\
&= o_P(h^4) + o_P\left(\frac{1}{nh^{d+2}}\right) \quad (\text{by (43) and (44)}).
\end{aligned} \tag{45}$$

Since Theorem 2 implies  $\text{Risk}_{n,2} = O(h^4) + O\left(\frac{1}{nh^{d+2}}\right)$ , by (45) we have

$$\frac{\widehat{\text{Risk}}_{n,2} - \text{Risk}_{n,2}}{\text{Risk}_{n,2}} = o_P(1) \tag{46}$$

which proves the theorem.

Note that in order (46) to hold, we need  $\|\widehat{p}_n - p\|_{3, \max} = o_P(1)$ . By Lemma 5,

$$\|\widehat{p}_n - p\|_{3, \max} = O(h^2) + O_P\left(\sqrt{\frac{\log n}{nh^{d+6}}}\right). \tag{47}$$

Thus, a sufficient condition to  $\|\widehat{p}_n - p\|_{3, \max} = o_P(1)$  is to pick  $h$  such that  $\frac{\log n}{nh^{d+6}} \rightarrow 0$  and  $h \rightarrow 0$ . This gives the restriction for the smoothing parameter  $h$ .

□

## References

- [1] Y.-C. Chen, C. R. Genovese, and L. Wasserman. Asymptotic theory for density ridges. *arXiv preprint arXiv:1406.5663*, 2014.
- [2] H. Federer. Curvature measures. *Trans. Am. Math. Soc*, 93, 1959.
- [3] C. R. Genovese, M. Perone-Pacifico, I. Verdinelli, and L. Wasserman. Nonparametric ridge estimation. *The Annals of Statistics*, 42(4):1511–1545, 2014.

—
